# Supplementary material
Source: PubMed Central journal article supplement (PMC2708679)
Supplement: 0812631106_0812631106SI.pdf [file 0812631106_0812631106SI.pdf]

# Supporting Information

Williams et al. 10.1073/pnas.0812631106

## SI Text

**Methods of Microwear Sampling and Imaging.** To avoid coating original material or subjecting it to analysis under vacuum, high-resolution epoxy replicas were prepared for scanning electron microscopy by using methods known to reproduce microwear with high fidelity (1, 2). Occlusal surfaces of teeth were cleaned nonabradively with a combination of liquid acetone/ethanol and ethomeen-based solvent gels (3, 4) by using techniques developed at the Natural History Museum Palaeontology Conservation Unit for cleaning without abrasion. Molds were prepared by using polyvinylsiloxane impression medium (Specdex Light; Coltene Whaledent). Casts were made by using Araldite 20/20 epoxy resin. Replicas were coated with gold (Emitech K500X sputter coater).

Imaging for the main analyses of within- and between-tooth variation used a Hitachi S-3600N scanning electron microscope (SEM; secondary electron, topographic mode) with settings standardized at: accelerating voltage, 15 kV; working distance, 18 mm; and automatic contrast and brightness. Standardization is important for comparability of datasets (5). For image capture, the orientation of the occlusal surface of the teeth was standardized, with the long axis of the tooth row and the flat occlusal surfaces of the teeth perpendicular to the electron beam. SEM images were captured at a magnification of 300, providing a sampling site field of view of  $417 \times 312 \mu\text{m}$ , comparable with that commonly used in analysis of occlusal microwear in mammals (6, 7). Microwear was sampled at 11 different sites on 1

distal tooth of *Edmontosaurus* right maxilla NHM R3638 (tooth 2) and at 1 central site on each of 9 further teeth from the same tooth row. Additional data were obtained from 1 central site from 1 tooth in each of the 3 additional specimens (right maxilla NHM R3653, left maxilla NHM R3654, and right dentary NHM R3658). Sampling sites were selected to maximize the chances of obtaining in vivo microwear and to minimize postmortem artefacts. The latter are less problematic than might be supposed, because physical and chemical postmortem processes tend to obliterate microwear features rather than create artefacts (8, 9). To evaluate alternative statistical approaches to testing for differences in feature orientation between sites, microwear was also sampled at 7 sites along a vertical transect across *Edmontosaurus* right maxilla NHM R3638 (tooth 2). Images for this analysis were acquired by using an Alicona IFM (infinite focus microscope; an optical, focus variation-based technique). Sampling site field of view was  $285 \times 216 \mu\text{m}$ ; illumination coaxial. The 3D surface data acquired during this sampling were also used for assessments of scratch depth. Digital scanning electron micrographs and IFM images were downsampled to 900 pixels wide by 675 pixels high by using Adobe Photoshop 7. Microwear data were generated by using the custom software package Microware 4.02 (10), running on a Dell Latitude D505 computer running Windows XP Professional (Microsoft), with a 15-inch active matrix TFT display set at a screen resolution of  $1024 \times 768$  pixels, resulting in an onscreen magnification of approximately  $630\times$  for SEM and  $1000\times$  for IFM.

1. Galbany J, et al. (2006) Comparative analysis of dental enamel polyvinylsiloxane impression and polyurethane casting methods for SEM research. *Microsc Res Tech* 69:246–252.
2. Williams V, Purnell M, Gabbott S (2006) Dental microwear in dinosaurs: A comparative analysis of polysiloxane replication. *Dent Pract* 44:22–23.
3. Hedley G (1980) Solubility parameters and varnish removal: A survey. *Conservator* 4:12–18.
4. Southall A (1988) New approach to cleaning painted surfaces. *Conserv News* 37:43–44.
5. Gordon KD (1988) A review of methodology and quantification in dental microwear analyses. *Scanning Microsc* 2:1139–1147.
6. Grine FE, Ungar PS, Teaford MF (2002) Error rates in dental microwear quantification using scanning electron microscopy. *Scanning* 24:144–153.
7. Scott RS, et al. (2005) Dental microwear texture analysis shows within-species diet variability in fossil hominins. *Nature* 436:693–695.
8. King T, Andrews P, Boz B (1999) Effect of taphonomic processes on dental microwear. *Am J Phys Anthropol* 108:359–373.
9. Teaford MF (1988) Scanning electron microscope diagnosis of wear patterns versus artifacts on fossil teeth. *Scanning Microsc* 2:1167–1175.
10. Ungar PS (1995) A semiautomated image analysis procedure for the quantification of dental microwear II. *Scanning* 17:57–59.

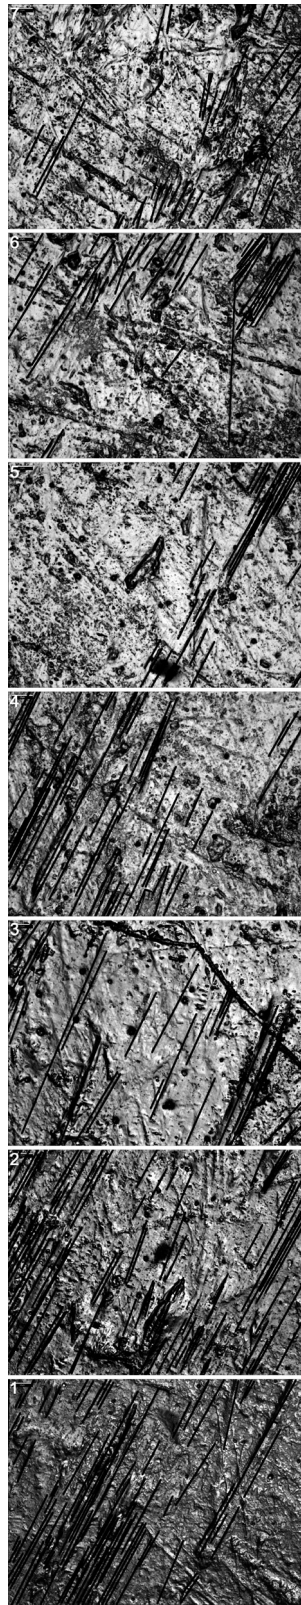

**Fig. S1.** Transect from apex (site 1) to base (site 7) across the functional surface of second tooth from posterior, right maxilla specimen NHM R3638 (see Fig. 1 for locations of sample sites). Class 2 microwear features are marked. Field of view is 285  $\mu\text{m}$  wide.
